# Supplementary material for: Gastrointestinal Bleeding in Children: The Role of Endoscopy and the Sheffield Scoring System in a Resource-Limited Setting
Source: PubMed Central journal article supplement (PMC10684120; doi:10.1097/pg9.0000000000000369), 2023-10-05
Supplement: pg9-4-e369-s001.pdf [file pg9-4-e369-s001.pdf]

## APPENDIX 1

### OGUNLESI MODIFICATION OF THE OYEDEJI SOCIAL CLASSIFICATION SCHEME

| SOCIAL CLASS | PROFESSION                                                                                                                                          | EDUCATIONAL ATTAINMENT                    |
|--------------|-----------------------------------------------------------------------------------------------------------------------------------------------------|-------------------------------------------|
| I            | Professional, Senior public servants, Owners of large business concerns, Senior military officers, large scale contractors.                         | University graduates or equivalents       |
| II           | Non-academic professionals e.g. Nurses, Secondary school teachers, Secretaries, Owners of medium sized business. Intermediate grade public servants | School certificate holders and equivalent |
| III          | Non manual skilled workers including clerks, typists, telephone operators. Junior school teachers. Drivers                                          | Grade II teachers or equivalent           |
| IV           | Petty traders. Labourers. Messengers.                                                                                                               | Primary certificate                       |
| V            | Unemployed. Full time house wives. Students. Subsistence farmers.                                                                                   | No formal education                       |

Ogunlesi TA, Dedeke IOF, Kuponiyi OT. Socio-economic classification of children attending specialist paediatric centres in Ogun state, Nigeria. Niger Med Pr. 2008; 54(1):21–25.

## APPENDIX 2

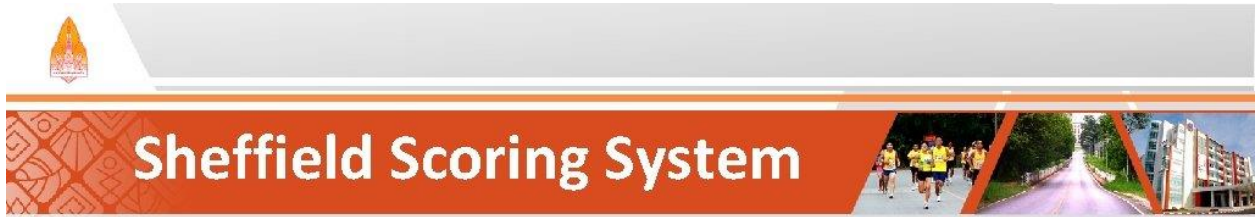

TABLE 6. Idealised scoring system

History taking

Significant preexisting condition: 1

Presence of melaena: 1

History of large amount of haematemesis: 1

Clinical assessment

HR >20 from the mean HR for age: 1

Prolonged capillary refill: 4

Laboratory findings

Hb drop of >20 g/L: 3

Management and resuscitation

Need for a fluid bolus: 3

Need for blood transfusion (Hb of <80 g/L): 6

Need for other blood product: 4

Total score 24: cutoff 8

Interventional group: true-positive = 31, false-negative = 4

Noninterventional group: true-negative = 31, false-positive = 3

Sensitivity: 88.57%, 95% CI 73.24–96.73

Specificity: 91.18%, 95% CI 76.30–98.04

PPV: 91.18%, 95% CI 76.30–98.04

NPV: 88.57%, 95% CI 73.24–96.73

CI = confidence interval; Hb = haemoglobin; HR = heart rate; NPV = negative predictive value; PPV = positive predictive value.

Thomson MA, et al. JPN 2015;60: 632–36.

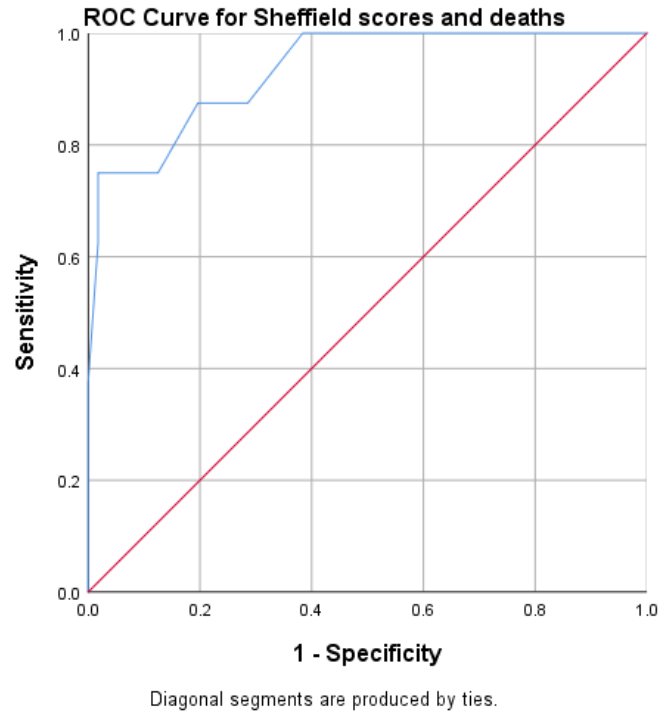

Figure 1a: ROC curve for Sheffield scores and deaths in the study participants

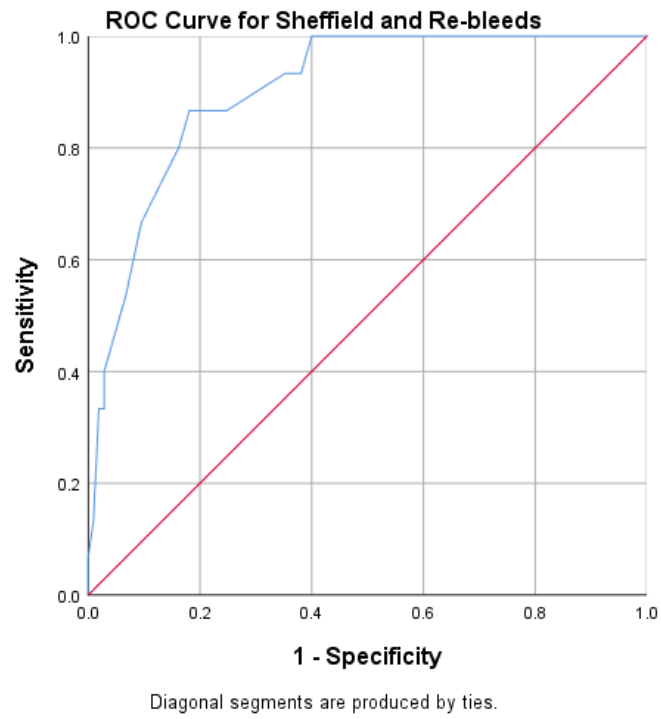

Figure 1b: ROC curve for Sheffield scores and re-bleeds in the study participants

**Table 1: Co-morbid conditions observed in the study participants**

| <b>Underlying/Comorbid Condition</b>                                 | <b>Frequency</b> |
|----------------------------------------------------------------------|------------------|
| Biliary Atresia                                                      | 1                |
| Chronic Kidney disease secondary to Nephrocalcinosis, Hydronephrosis | 2                |
| Congenital heart disease (ASD + Pulmonary stenosis)                  | 1                |
| Covid19 and MIS                                                      | 2                |
| Cholelithiasis                                                       | 1                |
| Food Allergy                                                         | 2                |
| GERD                                                                 | 1                |
| Juvenile Idiopathic Arthritis                                        | 1                |
| Hepatitis B                                                          | 1                |
| Hodgkin's lymphoma                                                   | 1                |
| Malaria                                                              | 6                |
| Metastatic Retinoblastoma                                            | 1                |
| Portal Hypertension                                                  | 5                |
| Nasopharyngeal Mass                                                  | 1                |
| Sickle cell anaemia                                                  | 5                |
| Retroviral disease                                                   | 2                |
| Portal vein thrombosis                                               | 4                |
| Sepsis                                                               | 33               |
| None                                                                 | 49               |

ASD- Atrial septal defect, MIS-Multisystem inflammatory response, GERD- Gastroesophageal reflux disease.

**Table 2: Characteristics of study participants in relation to GI endoscopy status.**

| <b>UPPER GI BLEEDING</b>     |                                           |                                          |                                 |                |
|------------------------------|-------------------------------------------|------------------------------------------|---------------------------------|----------------|
| <b>Parameter</b>             | <b>Endoscopy yes<br/>n=53<br/>N (%)</b>   | <b>Endoscopy no<br/>N=38<br/>N (%)</b>   | <b>Total<br/>N=91<br/>N (%)</b> | <b>P value</b> |
| <b>Age group(years)</b>      |                                           |                                          |                                 |                |
| <1                           | 4(7.6)                                    | 7(18.4)                                  | 11(12.1)                        |                |
| 1-<6                         | 13(24.5)                                  | 18(47.4)                                 | 31(34.1)                        | <b>0.015</b>   |
| 6-12                         | 22(41.5)                                  | 9(23.7)                                  | 31(34.1)                        |                |
| >12                          | 14(26.4)                                  | 4(10.5)                                  | 18(19.7)                        |                |
| <b>Gender</b>                |                                           |                                          |                                 |                |
| Male                         | 21(39.6)                                  | 29(76.3)                                 | 50(54.9)                        | <b>0.000</b>   |
| Female                       | 32(60.4)                                  | 9(23.7)                                  | 41(45.1)                        |                |
| <b>Died</b>                  |                                           |                                          |                                 |                |
| Yes                          | 3(5.7)                                    | 3(7.9)                                   | 6(6.6)                          | 0.671          |
| No                           | 50(94.3)                                  | 35(92.1)                                 | 85(93.4)                        |                |
| <b>Rebleeds/Readmissions</b> |                                           |                                          |                                 |                |
| Yes                          | 8(15.1)                                   | 6(15.8)                                  | 14(15.4)                        | 0.927*         |
| No                           | 45(84.9)                                  | 32(84.2)                                 | 77(84.6)                        |                |
| <b>Sheffield score</b>       |                                           |                                          |                                 |                |
| >8                           | 24(45.3)                                  | 19(50.0)                                 | 43(47.3)                        | 0.656          |
| <8                           | 29(54.7)                                  | 19(50.0)                                 | 48(52.7)                        |                |
| <b>Socioeconomic status</b>  |                                           |                                          |                                 |                |
| High                         | 7(13.2)                                   | 8(20.5)                                  | 15(16.5)                        | 0.571          |
| Middle                       | 31(58.5)                                  | 19(51.3)                                 | 50(54.9)                        |                |
| Low                          | 15()                                      | 11(28.2)                                 | 26(28.6)                        |                |
| <b>LOWER GI BLEEDING</b>     |                                           |                                          |                                 |                |
| <b>Parameter</b>             | <b>Endoscopy (yes)<br/>n=17<br/>N (%)</b> | <b>Endoscopy( No)<br/>n=12<br/>N (%)</b> | <b>Total<br/>n=29<br/>N (%)</b> | <b>P value</b> |
| <b>Age</b>                   |                                           |                                          |                                 |                |
| <1                           | 0 (0.0)                                   | 1(9.1)                                   | 1(3.4)                          | 0.146*         |
| 1-<6                         | 4 (22.2)                                  | 4(36.4)                                  | 8(27.6)                         |                |
| 6-12                         | 6 (33.3)                                  | 6(54.5)                                  | 12(41.4)                        |                |
| >12                          | 7 (44.4)                                  | 1(0.0)                                   | 8(27.6)                         |                |
| <b>Gender</b>                |                                           |                                          |                                 |                |
| Male                         | 10(58.8)                                  | 4(33.3)                                  | 14(48.3)                        | 0.176          |
| Female                       | 7(41.2)                                   | 8(66.7)                                  | 15(51.7)                        |                |
| <b>Died</b>                  |                                           |                                          |                                 |                |
| Yes                          | 1(5.9)                                    | 1(8.3)                                   | 2(6.9)                          | 0.291*         |
| No                           | 16(94.1)                                  | 11(91.7)                                 | 27(93.1)                        |                |
| <b>Rebleeds/Readmissions</b> |                                           |                                          |                                 |                |
| Yes                          | 3(17.6)                                   | 1(8.3)                                   | 4(13.8)                         | 0.473*         |
| No                           | 14(82.4)                                  | 11(91.7)                                 | 25(86.2)                        |                |
| <b>Sheffield score</b>       |                                           |                                          |                                 |                |
| >8                           | 3(17.6)                                   | 5(41.7)                                  | 8(27.6)                         | 0.154          |
| <8                           | 14(82.4)                                  | 7(58.3)                                  | 21(72.4)                        |                |
| <b>Socioeconomic status</b>  |                                           |                                          |                                 |                |
| High                         | 6(35.3)                                   | 1(8.3)                                   | 7(24.1)                         | 0.154*         |
| Middle                       | 9(52.9)                                   | 7(58.3)                                  | 16(55.2)                        |                |
| Low                          | 2(11.8)                                   | 4(33.3)                                  | 6(20.7)                         |                |

Chisquare stastic for pvalue,\*Fischer's exact test for p valu

**Table 3: Type of Bleed and Endoscopic yield in the study participants**

| <b>Type of Bleed</b>    | <b>Number of children with bleed</b> | <b>Number of participants with significant endoscopic finding</b> | <b>Endoscopic yield %</b> |
|-------------------------|--------------------------------------|-------------------------------------------------------------------|---------------------------|
| **All Haematemesis      | 52                                   | 40                                                                | 76.9                      |
| Haematemesis only       | 41                                   | 36                                                                | 87.8                      |
| Haematemesis and melena | 12                                   | 10                                                                | 83.3                      |
| Melena only             | 1                                    | 1                                                                 | 100.0                     |
| Haematochezia only      | 17                                   | 15                                                                | 88.2                      |

\*\*All Haematemesis=Haematemesis only+Haematemesis with melena+Haematemesis with haematochezia from UGIB

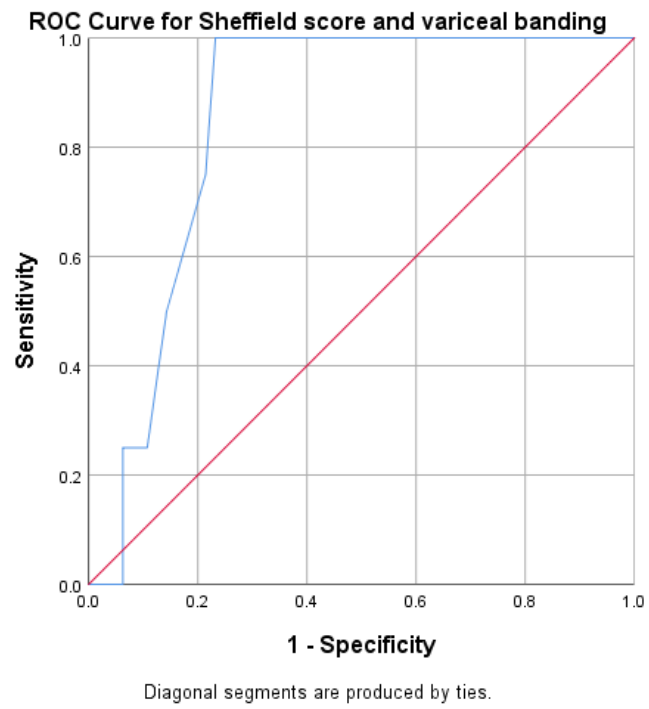

Figure 2: Receiver operating curve for Sheffield score and variceal banding in the participants with UGIB.
